# Supplementary material for: The Lagrangian Atmospheric Radionuclide Transport Model (ARTM) – Sensitivity studies and evaluation using airborne measurements of power plant emissions
Source: Copernicus journal article supplement (doi:10.5194/egusphere-2023-245), 2023-03-16
Supplement: Supplementary file [file egusphere-2023-245-AC1-supplement.pdf]

To  
Editorial support team  
Copernicus Publications

12 July 2023  
Answer to reviewers for **egusphere-2023-245**

**Anonymous Referee #1**, 26 May 2023:

Hanfland et al. present an extensive evaluation of a Lagrangian radionuclide transport model, incorporating sensitivity analyses, tests of adherence to the well-mixed criterion, and comparisons against real-world observations downwind of power plant emissions. Overall, the analyses are solid and the presentation is fine.

I only have minor comments before suggesting the paper for publication:

**Answer to Reviewer #1:**

We thank the reviewer for her/his interest in the presented paper and his/her help to improve the quality of this manuscript.

We answer the comments below.

**Comment 1:** Line 15: reword to "allow evaluation of model performance"

**Answer to Comment 1:** Corrected.

**Comment 2:** Line 95: "Sensitiviy analysis (SA)..."

**Answer to Comment 2:** We thank the reviewer for his/her comment which results in a better understandability of the text. We added the abbreviation in the text.

**Comment 3:** Line 171: "correspond to typical"

**Answer to Comment 3:** Corrected.

**Comment 4:** Line 346: what is meant by "quite high"?

**Answer to Comment 4:** We apologize for this imprecise formulation. We replaced it by "with source heights of mainly 100 m to 200 m" in the text to make the meaning clear.

**Comment 5:** Line 386: "As tracer  $^{14}\text{C}$  in its bounded form as  $\text{CO}_2$  is used" doesn't seem to make sense

**Answer to Comment 5:** We corrected the formulation to "As tracer  $\text{CO}_2$  with the radioactive isotope  $^{14}\text{C}$  is used.". In combination with the previous sentence it makes clear that ARTM only works with predefined radionuclides that may appear in different chemical compounds.

**Comment 6:** Line 459: "simulations' uncertainties"

**Answer to Comment 6:** Corrected.
